# Supplementary material
Source: PubMed Central journal article supplement (PMC3780294)
Supplement: Supp_Fig1.pdf [file Supp_Fig1.pdf]

## Supplementary Data

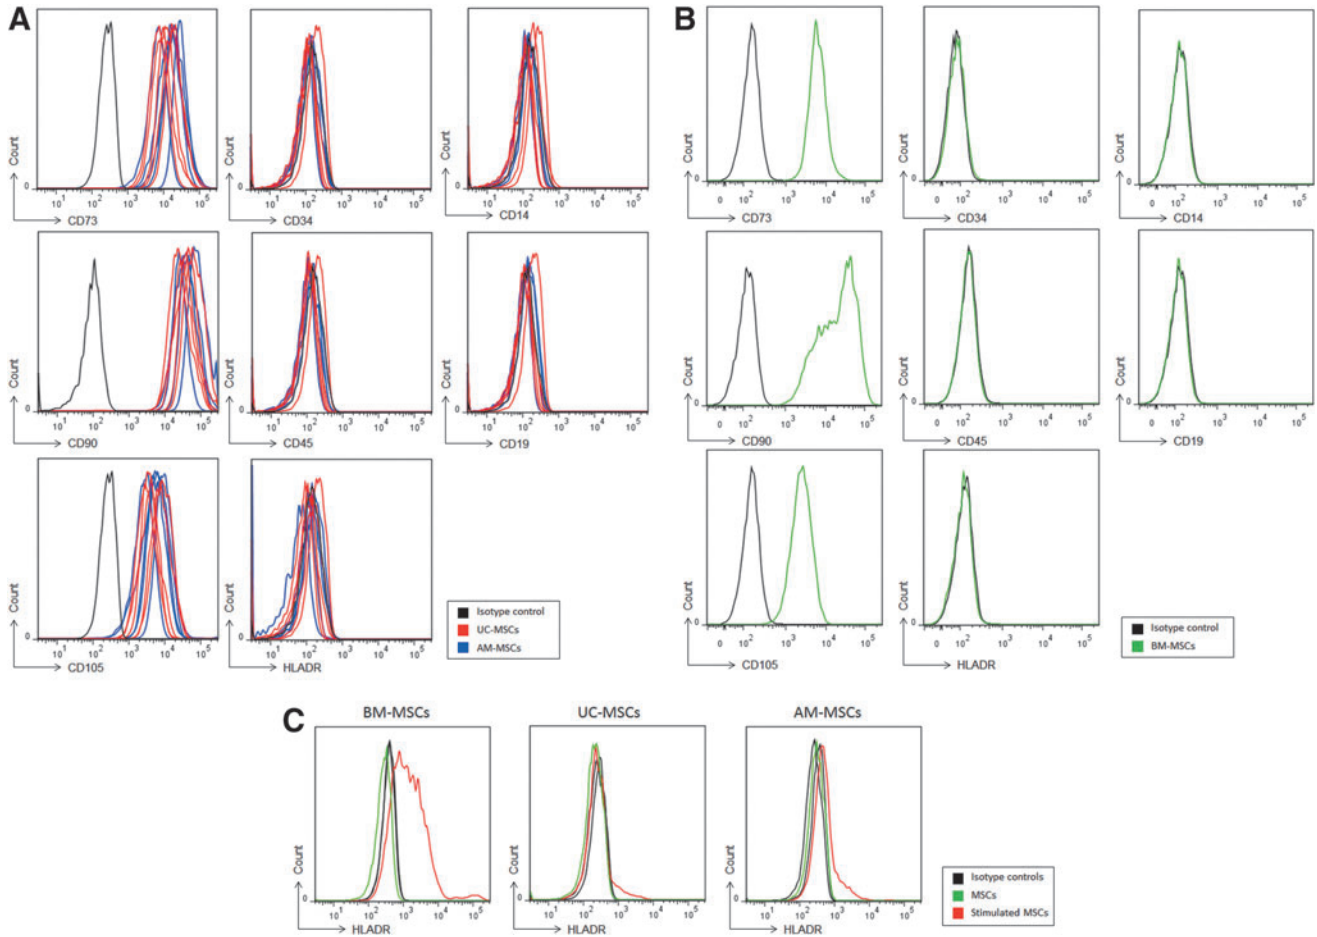

**SUPPLEMENTARY FIG. S1.** Phenotypic characterization of MSCs derived from UC, AM and BM. **(A, B)** Fluorescence-activated cell sorting (FACS) analysis of positive (CD73, CD90, CD105) and negative (CD34, CD45, HLADR, CD14, CD19) cell surface markers. **(A)** Histograms of UC- (red line) and AM- (blue line) MSCs from five donors stained with the respective antibody and representative isotype control (black line) are shown. **(B)** Histograms of BM-MSCs (green line) from one representative donor stained with the respective antibody and isotype control (black line) are shown. **(C)** FACS analysis for HLADR on BM-, UC-, and AM-MSCs with (red line) and without (green line) tumor necrosis factor-alpha and interferon-gamma stimulation is shown. Both isotype controls (with and without stimulation) are shown in black. AM, amniotic membrane; BM, bone marrow; MSCs, mesenchymal stromal cells; UC, umbilical cord.
