# Supplementary material
Source: PubMed Central journal article supplement (PMC3780294)
Supplement: Supp_Table1.pdf [file Supp_Table1.pdf]

SUPPLEMENTARY TABLE S1. LIST OF ANTIBODIES USED FOR FLUORESCENCE-ACTIVATED CELL SORTING STAINING

| <i>Antibody</i>            | <i>Clone/Cat. No</i> | <i>Isotype</i> | <i>Source</i>  |
|----------------------------|----------------------|----------------|----------------|
| CD14                       | M5E2                 | IgG2a          | BD             |
| CD19                       | 4G7                  | IgG1, k        | BD             |
| CD34                       | 581/CD34             | IgG1           | BD             |
| CD45                       | HI30                 | IgG1           | BD             |
| HLA-DR                     | G46-6                | IgG2a, k       | BD             |
| CD73                       | AD2                  | IgG1, k        | BD             |
| CD90                       | 5E10                 | IgG1, k        | Biozol         |
| CD105                      | 266                  | IgG1, k        | BD             |
| CD31                       | WM59                 | IgG1, k        | BD             |
| CD49d                      | 9F10                 | IgG1, κ        | BD             |
| CD136                      | MM0478-10F24         | IgG1           | Abcam          |
| CD142                      | HTF-1                | IgG1, k        | BD             |
| CD143                      | 5-369                | IgG1, k        | BioLegend      |
| CD146                      | HLDA8                | IgG1           | Miltenyi       |
| CD166                      | 3A6                  | IgG1           | BD             |
| CD200                      | MRC-OX-104           | IgG1, k        | BD             |
| CD271                      | ME20.4-1.H4          | IgG1           | Miltenyi       |
| CD349                      | W3C4E11              | IgM, k         | Biolegend      |
| Her1                       | H11                  | IgG1, k        | DakoCytomation |
| Her2                       | TA-1                 | IgG1, k        | Calbiochem     |
| MCSP                       | —                    | IgG1, k        | In house       |
| C-Met                      | —                    | IgG1, k        | In house       |
| CD146                      | HLDA8                | IgG1, k        | Miltenyi       |
| FITC Mouse IgG1, k         | MOPC-21              | IgG1, k        | BD             |
| PE Mouse IgG1, k           | MOPC-21              | IgG1, k        | BD             |
| FITC Mouse IgG2a           | G155-178             | IgG2a, k       | BD             |
| Purified Mouse IgG1, k     | MOPC-31C             | IgG1, k        | BD             |
| APC-Mouse IgG1, k          | MOPC-21              | IgG1, k        | BD             |
| FITC Mouse IgG1, k         | MOPC-21              | IgG1, k        | BioLegend      |
| FITC Mouse IgG1, k         | IS5-21F5             | IgG1, k        | Miltenyi       |
| PE Mouse IgG2a, k          | G155-178             | IgG2a, k       | BD             |
| PE Mouse IgG1, k           | IS5-21F5             | IgG1, k        | Miltenyi       |
| Purified Mouse IgG1, k     | MOPC-21              | IgG1, k        | BioLegend      |
| Purified Human IgG1, k     | I5154                | IgG1, k        | Sigma          |
| Alexa Fluor647 Mouse IgM,k | MM-30                | IgM, k         | BioLegend      |
| IgG (H+L)                  | A-11029              | IgG (H+L)      | Invitrogen     |
| IgG (H+L)                  | A-11013              | IgG (H+L)      | Invitrogen     |
