# Supplementary material
Source: PubMed Central journal article supplement (PMC3780294)
Supplement: Supp_Table3.pdf [file Supp_Table3.pdf]

SUPPLEMENTARY TABLE S3. CYTOGENETIC ANALYSIS  
 OF MESENCHYMAL STROMAL CELLS USING 24 PROBE  
 FLUORESCENCE IN SITU HYBRIDIZATION  
 (WHOLE GENOME PAINTING)

| <i>Donor</i> | <i>Chromosomal<br/>aberration UC</i> | <i>Chromosomal<br/>aberration AM</i> |
|--------------|--------------------------------------|--------------------------------------|
| 1            | T (14;?), (1/62)                     | T (11;?), (1/57)                     |
| 2            | —                                    | Tetraploid (1/54)                    |
| 3            | —                                    | —                                    |
| 4            | —                                    | —                                    |
| 5            | + 16 (del16q12) (1/62)               | —                                    |

Metaphase fluorescence in situ hybridization analysis with chromosome-specific painting probes (WCP) detects specific chromosomes of mitotic cells using fluorescently labeled DNA probes. The result is based on the microscopic analysis of the indicated amounts of metaphases.

T(z; ?), translocation from chromosome z to a not further determined acrocentric chromosome; +, trisomy; q, long arm of chromosome; (1/x), finding in one out of x analyzed cells; AM, amniotic membrane; UC, umbilical cord.
